# Supplementary material
Source: publisher site journal article supplement (https://www.degruyterbrill.com/publication/isbn/9783110352801/downloadAsset/9783110352801_Inhaltsverzeichnis.pdf)
Supplement: Supplementary file 1 [file 9783110352801_Inhaltsverzeichnis.pdf]

# Inhaltsverzeichnis

## **I        Theoretischer Teil — 3**

- 1        Gegenstand der Untersuchung — 3**
  - 1.1      Interdisziplinärer Ansatz — 3**
  - 1.2      Sublexikalische Sprachverarbeitung — 5**
    - 1.2.1    Sublexikalische Verarbeitung und Worterkennung — 5**
    - 1.2.2    Sublexikalische Verarbeitungsprozesse  
und Repräsentationsebenen — 7**
    - 1.2.3    Phonologisches Wissen — 9**
  - 1.3      Phonotaktisches Wissen — 11**
    - 1.3.1    Phonotaktik als Grammatik:  
kategoriale und graduelle Constraints — 11**
    - 1.3.2    Phonotaktik als Erfahrung: Gebrauchsfrequenz und Lexikon — 13**
    - 1.3.3    Kategoriale Legalität und graduelle phonotaktische  
Wohlgeformtheit — 15**
  - 1.4      Behaviorale Verarbeitungseffekte  
phonotaktischer Illegalität — 17**
    - 1.4.1    Segmentation, Rekonstruktion und Kompensation — 17**
    - 1.4.2    Phonotaktische Reparaturen — 20**
    - 1.4.3    Phonotaktische Verletzungen — 22**
  - 1.5      Probleme beim Nachweis kategorialen phonotaktischen  
Wissens — 24**
  - 1.6      Dorsalfrikativ-Assimilation (DFA) — 27**
    - 1.6.1    Allophonie von /ç/ und /x/ im Deutschen — 27**
    - 1.6.2    Phonologische Analyse — 29**
    - 1.6.3    Implikationen für diese Arbeit — 31**
- 2        Methodologischer Zugang — 36**
  - 2.1      Ereigniskorrelierte Hirnpotentiale (EKP) — 36**
  - 2.2      Mismatch Negativity (MMN) — 38**
  - 2.3      MMN als Indikator für sprachliches Wissen  
im Langzeitgedächtnis — 41**
  - 2.4      EKP-Korrelate phonotaktischer Illegalität — 43**
- 3        Forschungsziel — 46**

**II Experimenteller Teil — 49**

- 4 Methodologische Herausforderungen — **51**
- 4.1 Kontrolle exogener Effekte durch physikalische Unterschiede — **51**
- 4.2 Kontrolle exogener Effekte durch die Stimulusrate — **51**
- 4.3 Manipulation des Stimulusmaterials — **52**
- 4.4 Phonotaktische Illegalität und phonetische Natürlichkeit — **53**
- 4.5 Aufmerksamkeitskontrolle — **54**
  
- 5 Übergreifende Methoden — **55**
- 5.1 Versuchsteilnehmer — **55**
- 5.2 Stimulusmaterial — **55**
- 5.3 Stimulationstechnik und Messplatzaufbau — **57**
- 5.4 Versuchsablauf — **57**
- 5.5 Aufzeichnung des Elektroenzephalogramms — **58**
- 5.6 Datenanalyse — **59**
- 5.7 Statistische Analyse — **59**
  
- 6 Experiment 1. Phonotaktische Verletzung DFA Typ \*IX synchron zum Wechsel eines Phonems — **61**
- 6.1 Einleitung — **61**
- 6.2 Methoden — **62**
- 6.2.1 Versuchsteilnehmer — **62**
- 6.2.2 Stimuli — **63**
- 6.2.3 Design und Ablauf — **63**
- 6.2.4 Datenanalyse — **65**
- 6.3 Ergebnisse — **65**
- 6.3.1 MMN — **65**
- 6.3.1 Kontrollen — **66**
- 6.4 Diskussion — **69**
  
- 7 Experiment 2. Phonotaktische Verletzung DFA Typ \*IX nach dem Wechsel eines Phonems — **74**
- 7.1 Einleitung — **74**
- 7.2 Methoden — **75**
- 7.2.1 Versuchsteilnehmer — **75**
- 7.2.2 Stimuli — **75**
- 7.2.3 Design und Ablauf — **76**
- 7.2.4 Datenanalyse — **76**
- 7.3 Ergebnisse — **77**

|        |                                                                                                                                |
|--------|--------------------------------------------------------------------------------------------------------------------------------|
| 7.3.1  | Effekte durch den Vokalwechsel — 77                                                                                            |
| 7.3.2  | PN — 78                                                                                                                        |
| 7.3.3  | Kontrollen — 79                                                                                                                |
| 7.4    | Diskussion — 81                                                                                                                |
| 8      | Experiment 3. Phonotaktische Verletzung DFA Typ *AÇ<br>nach dem Wechsel eines Phonems — 84                                     |
| 8.1    | Einleitung — 84                                                                                                                |
| 8.2    | Methoden — 86                                                                                                                  |
| 8.2.1  | Versuchsteilnehmer — 86                                                                                                        |
| 8.2.2  | Stimuli — 86                                                                                                                   |
| 8.2.3  | Design und Ablauf — 87                                                                                                         |
| 8.2.4  | Datenanalyse — 87                                                                                                              |
| 8.3    | Ergebnisse — 87                                                                                                                |
| 8.3.1  | Effekte durch den Vokalwechsel — 87                                                                                            |
| 8.3.2  | PN — 88                                                                                                                        |
| 8.3.3  | Kontrollen — 89                                                                                                                |
| 8.4    | Diskussion — 90                                                                                                                |
| 9      | Experiment 4a. Phonotaktische Verletzung DFA Typ *IC und *AÇ<br>unabhängig von lautkategorialer Devianz — 96                   |
| 9.1    | Einleitung — 96                                                                                                                |
| 9.2    | Methoden — 97                                                                                                                  |
| 9.2.1  | Versuchsteilnehmer — 97                                                                                                        |
| 9.2.2  | Stimuli — 98                                                                                                                   |
| 9.2.3  | Design und Ablauf — 100                                                                                                        |
| 9.2.4  | Datenanalyse — 102                                                                                                             |
| 9.3    | Ergebnisse — 103                                                                                                               |
| 9.4    | Diskussion — 105                                                                                                               |
| 10     | Experiment 4b. Wechselwirkung phonetischer und phonotaktischer<br>Verletzungen DFA Typ *IC und *AÇ in gesplitted Stimuli — 110 |
| 10.1   | Einleitung — 110                                                                                                               |
| 10.2   | Methoden — 112                                                                                                                 |
| 10.2.1 | Versuchsteilnehmer — 113                                                                                                       |
| 10.2.2 | Stimuli — 113                                                                                                                  |
| 10.2.3 | Design und Ablauf — 124                                                                                                        |
| 10.2.4 | Datenanalyse — 124                                                                                                             |
| 10.3   | Ergebnisse — 125                                                                                                               |
| 10.3.1 | PN — 125                                                                                                                       |

- 10.3.2 N2 (nur Standards) — **127**
- 10.4 Diskussion — **129**
- 10.4.1 Keine PN bei gesplitten Stimuli — **129**
- 10.4.2 N2-Effekt durch fehlgeleitete F2-Transitionen — **130**
- 10.4.3 Interaktion von N2-Effekt und PN — **133**
- 10.4.4 Splicing als Methode zur Stimulusmanipulation — **136**

### **III Übergreifende Diskussion — 139**

- 11 Überblick über die Ergebnisse — **141**
- 12 Die phonotaktische Negativierung im Kontext der automatischen Regelverletzungserkennung — **146**
- 12.1 Verarbeitung illegaler Deviants — **146**
- 12.2 Verarbeitung illegaler Standards — **149**
- 12.3 Regelverletzungsdetektion und phonotaktische Evaluierung — **151**
- 13 Die phonotaktische Negativierung als Indikator für die Verletzung kategorialer phonotaktischer Beschränkungen — **154**
- 14 Phonetisches Wissen und die Bedeutung perzeptueller Kohärenz — **159**
- 15 Schluss und Desiderata — **163**

### **IV Zusammenfassung — 165**

### **V Summary — 175**

### **VI Anhang — 185**

- Experiment 1 — **187**
- Experiment 2 — **192**
- Experiment 3 — **204**
- Experiment 4a — **216**
- Experiment 4b — **219**

### **Abkürzungsverzeichnis — 227**

### **Literaturverzeichnis — 229**

### **Sachregister — 247**
